# Supplementary material
Source: publisher figshare collection journal article supplement (https://karger.figshare.com/ndownloader/files/7636714)
Supplement: Supplementary file 1 [file 7636714]

**Supplemental table 1** Data collection rates

| **Parameters** | **Laparoscopic group**  **(n = 96)** | **Open group**  **(n = 52)** |
| --- | --- | --- |
| Body composition status (%)  baseline  POM 1  POM 3  POM 6  POM 12  Nutrition status (%)  baseline  POM 1  POM 3  POM 6  POM 12 | 98.9  97.3  96.2  98.4  96.6 | 97.1  97.1  97.1  97.8  98.1 |
| 97.7  93.6  91.8  94.2  95.3 | 98.1  96.6  98.1  98.1  97.1 |

.
